# Supplementary material for: Urchin-like polypyrrole nanoparticles for highly sensitive and selective chemiresistive sensor application
Source: Royal Society of Chemistry journal article supplement (doi:10.1039/c3nr05864f), 2014-01-01
Supplement: c3nr05864f1.pdf [file c3nr05864f1.pdf]

Electronic Supplementary Information (ESI) for

## **Urchin-Like Polypyrrole Nanoparticles for Highly Sensitive and Selective Chemiresistive Sensor Application**

**Jun Seop Lee, Jaemoon Jun, Dong Hoon Shin and Jyongsik Jang \***

*World Class University (WCU) program of Chemical Convergence for Energy & Environment (C<sub>2</sub>E<sub>2</sub>), School of Chemical and Biological Engineering, College of Engineering, Seoul National University (SNU), 599 Gwanangno, Gwanak-gu, Seoul, 151-742 (Korea). Fax: +82-2-888-7295; Tel: 82-2-880-8348; e-mail: jsjang@plaza.snu.ac.kr*

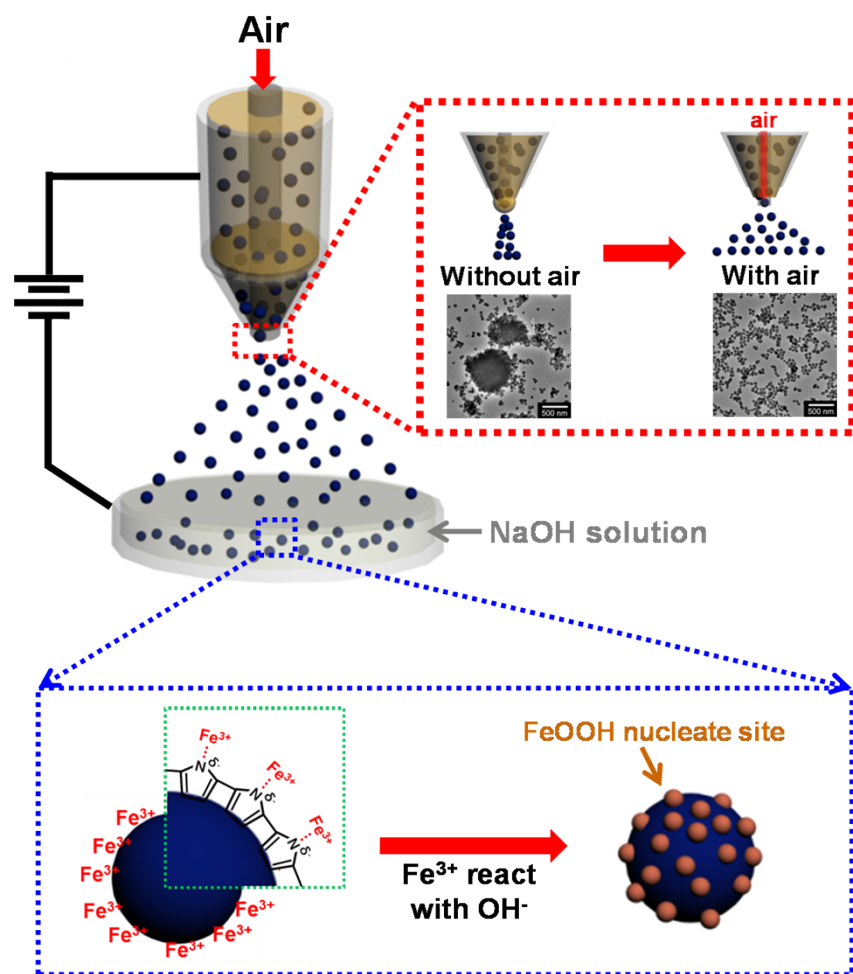

**Fig. S1.** Schematic illustration of the formation of FeOOH nucleate site by using dual-nozzle electro spray method with air blowing (red inset: comparison of electro sprayed particles by control compressed air blowing).

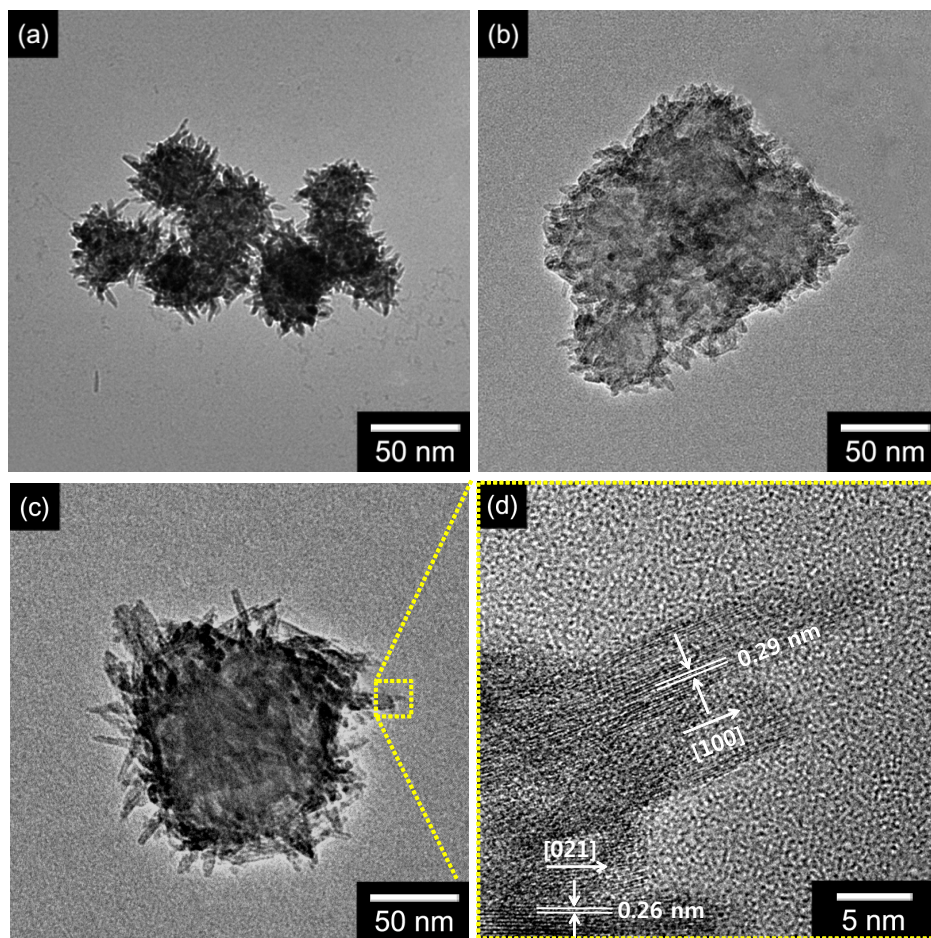

**Fig. S2.** TEM images of FeOOH nanoneedle decorated PPy NPs with different diameters of (a) 30 nm, (b) 60 nm, and (c) 100 nm. (d) HR-TEM image of FeOOH nanoneedles on the surface.

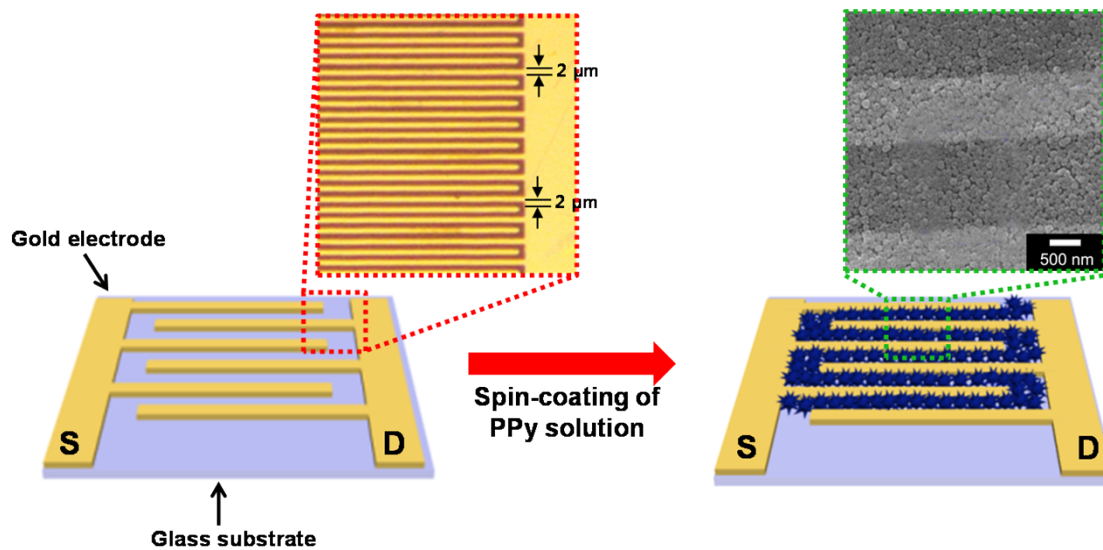

**Fig. S3.** Schematic illustration of inter-digitated array electrode and U<sub>2</sub>PPy nanoparticle deposited electrode by spin-coating method (red inset: optical micrograph image of electrode; green inset: SEM image of U<sub>2</sub>PPy deposited electrode).

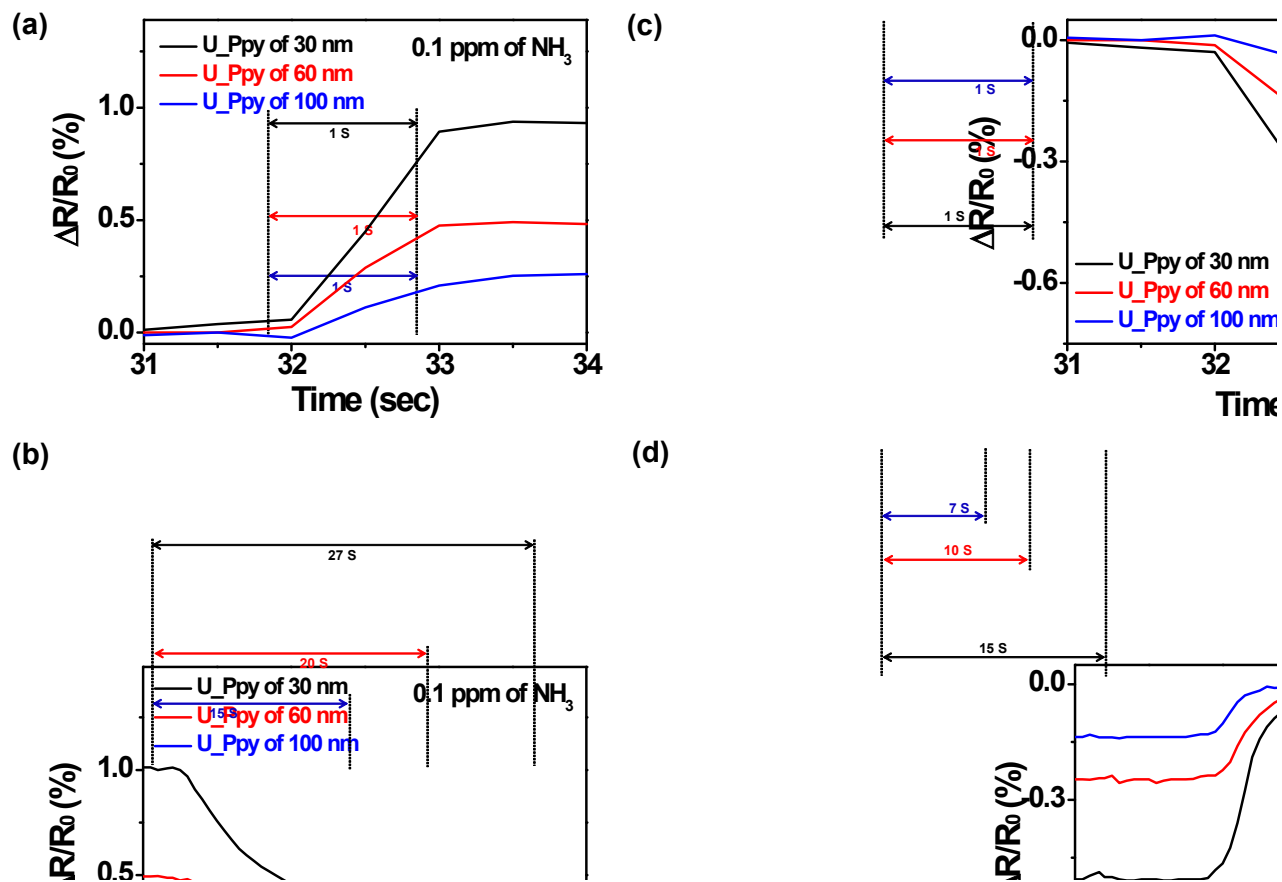

**Fig. S4.** The response and recovery times of urchin-like PPy particles with different diameters toward (a), (b) 0.1 ppm of  $\text{NH}_3$  and (c), (d) 5 ppm of MeOH gas (black: 30 nm; red: 60 nm; blue: 100 nm diameter).

**Table S1.** Minimum detectable level of 30-nm-diameter pristine PPy and U\_PPy nanoparticles to various gases

|                | pristine PPy | U_PPy    |
|----------------|--------------|----------|
| Acetaldehyde   | 100 ppm      | 10 ppm   |
| Acetone        | 10 ppm       | 2 ppm    |
| Ammonia        | 5 ppm        | 0.01 ppm |
| Butane         | 10 ppm       | 1 ppm    |
| Benzene        | 10 ppm       | 1 ppm    |
| Chloroform     | 30 ppm       | 2 ppm    |
| Dimethylamine  | 30 ppm       | 1 ppm    |
| Ethanol        | 40 ppm       | 0.2 ppm  |
| Hexane         | 150 ppm      | 30 ppm   |
| Methanol       | 50 ppm       | 0.5 ppm  |
| Naphtalene     | 10 ppm       | 1 ppm    |
| Trimethylamine | 100 ppm      | 5 ppm    |
| Toluene        | 10 ppm       | 1 ppm    |
